# Supplementary material for: Modelling the persistence of mosquito vectors of malaria in Burkina Faso
Source: PubMed Central journal article supplement (PMC5879775; doi:10.1186/s12936-018-2288-3), 2018-04-02
Supplement: 12936_2018_2288_MOESM1_ESM.pdf [file 12936_2018_2288_MOESM1_ESM.pdf]

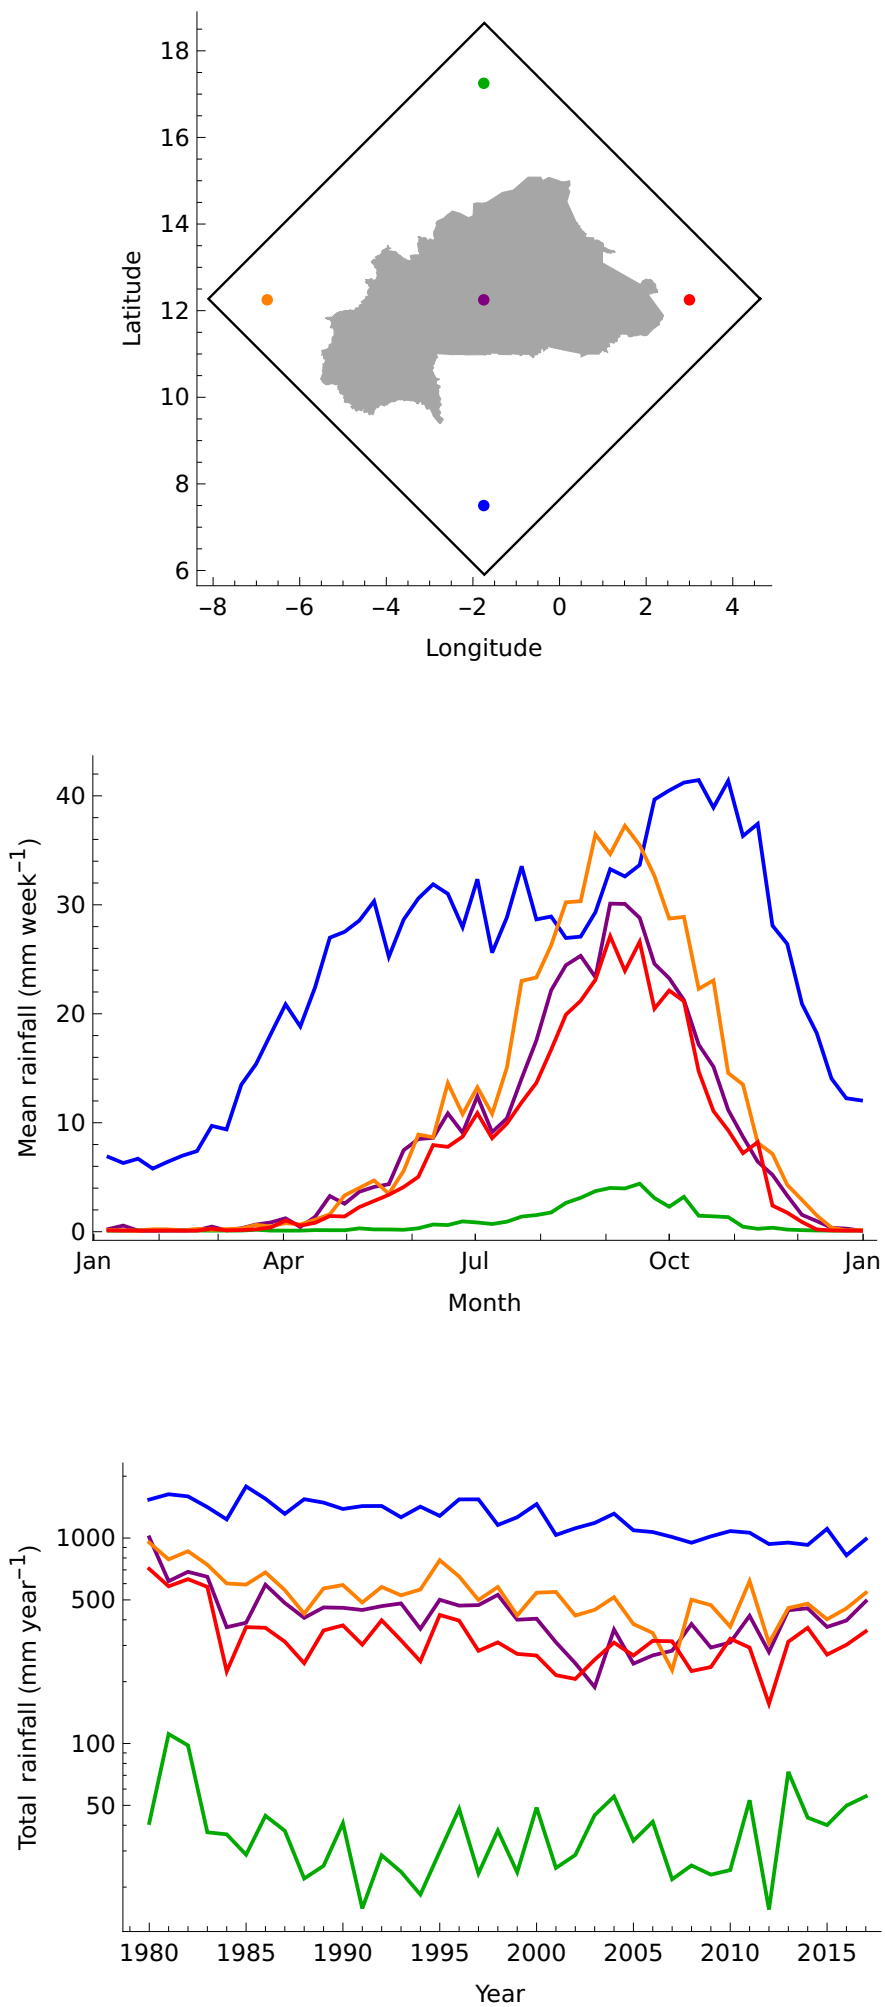

**Figure S1:** Rainfall across the simulation area. (b) and (c) plot rainfall profiles for five locations across the simulation region marked as points in (a)
