# Supplementary material for: Modelling the persistence of mosquito vectors of malaria in Burkina Faso
Source: PubMed Central journal article supplement (PMC5879775; doi:10.1186/s12936-018-2288-3), 2018-04-02
Supplement: 12936_2018_2288_MOESM3_ESM.pdf [file 12936_2018_2288_MOESM3_ESM.pdf]

| Parameter                                                                                                                                        | Interpretation                                                                                                                                         | Units                                         | default                   |
|--------------------------------------------------------------------------------------------------------------------------------------------------|--------------------------------------------------------------------------------------------------------------------------------------------------------|-----------------------------------------------|---------------------------|
| <b>Demographic parameters</b>                                                                                                                    |                                                                                                                                                        |                                               |                           |
| $T_L$                                                                                                                                            | Larval duration                                                                                                                                        | days                                          | 10                        |
| $\mu_J$                                                                                                                                          | Larval density independent mortality                                                                                                                   | $day^{-1}$                                    | 0.05                      |
| $\mu_A$                                                                                                                                          | Adult mortality                                                                                                                                        | $day^{-1}$                                    | 0.125                     |
| $\theta$                                                                                                                                         | Oviposition rate                                                                                                                                       | $(\text{mated female})^{-1}(\text{day})^{-1}$ | 9                         |
| $\beta$                                                                                                                                          | Density of males when mating rate = $1/2(\text{unmated female})^{-1}(\text{day})^{-1}$                                                                 | -                                             | 100                       |
| <b>Carrying capacity</b>                                                                                                                         |                                                                                                                                                        |                                               |                           |
| $\left[ \alpha(x, t) = \alpha_0 + \alpha_1(1 - e^{-\phi r(x, t)}) + \alpha_2(1 - e^{-\kappa[W_p(x) + W_n(x)(1 - e^{-\delta r(x, t)})]}) \right]$ |                                                                                                                                                        |                                               |                           |
| $\alpha_0$                                                                                                                                       | Baseline contribution                                                                                                                                  | -                                             | 0                         |
| $\alpha_1$                                                                                                                                       | Maximum contribution from rain <i>per se</i>                                                                                                           | -                                             | $2 \times 10^5$           |
| $\alpha_2$                                                                                                                                       | Maximum contribution from water bodies                                                                                                                 | -                                             | $2 \times 10^5$           |
| $\phi$                                                                                                                                           | Increase in $\alpha(x, t)/\alpha_1$ per mm rain per week (when rainfall low)                                                                           | $(\text{mm rain})^{-1}\text{week}^{-1}$       | 0.03                      |
| $\kappa$                                                                                                                                         | Increase in $\alpha(x, t)/\alpha_2$ per km standing water (within 5km; when water bodies rare)                                                         | $(\text{km water})^{-1}$                      | 0.8                       |
| $\delta$                                                                                                                                         | Increase in length of standing water from non-permanent waterways per km non-permanent waterways (within 5km) per mm rain per week (when rainfall low) | $(\text{mm rain})^{-1}\text{week}^{-1}$       | 0.03                      |
| <b>Spatial parameters</b>                                                                                                                        |                                                                                                                                                        |                                               |                           |
| $d$                                                                                                                                              | Probability adult disperses to a connected village                                                                                                     | $day^{-1}$                                    | 0.001                     |
| $L_d$                                                                                                                                            | Maximum distance at which populations are connected to each other                                                                                      | km                                            | 10                        |
| $L_w$                                                                                                                                            | Maximum distance at which populations are connected to water bodies                                                                                    | km                                            | 5                         |
| <b>Aestivation</b>                                                                                                                               |                                                                                                                                                        |                                               |                           |
| $t_{A1}$                                                                                                                                         | Day mated females begin aestivation                                                                                                                    | date                                          | 27 <sup>th</sup> October  |
| $t_{A2}$                                                                                                                                         | Day mated females cease aestivation                                                                                                                    | date                                          | 16 <sup>th</sup> December |
| $t_{A3}$                                                                                                                                         | Day mated females begin emerging from aestivation                                                                                                      | date                                          | 20 <sup>th</sup> May      |
| $t_{A4}$                                                                                                                                         | Day mated females finish emerging from aestivation                                                                                                     | date                                          | 19 <sup>th</sup> June     |
| $\psi$                                                                                                                                           | Probability female goes into aestivation                                                                                                               | $day^{-1}$                                    | 0                         |
| $\mu_E$                                                                                                                                          | Probability female dies during aestivation                                                                                                             | -                                             | 0.95                      |
| <b>Long distance migration</b>                                                                                                                   |                                                                                                                                                        |                                               |                           |
| $t_{D1}$                                                                                                                                         | Day mated females begin NE→SW migration                                                                                                                | date                                          | 1 <sup>st</sup> January   |
| $t_{D2}$                                                                                                                                         | Day mated females end NE→SW migration                                                                                                                  | date                                          | 30 <sup>th</sup> January  |
| $t_{D3}$                                                                                                                                         | Day mated females begin SW→NE migration                                                                                                                | date                                          | 20 <sup>th</sup> July     |
| $t_{D4}$                                                                                                                                         | Day mated females end SW→NE migration                                                                                                                  | date                                          | 19 <sup>th</sup> August   |
| $d_M$                                                                                                                                            | Probability female migrates                                                                                                                            | $day^{-1}$                                    | 0                         |
| $\mu_m$                                                                                                                                          | Probability female dies during migration                                                                                                               | -                                             | 0.95                      |

**Table S1:** Model parameters
