# Supplementary material for: Modelling the persistence of mosquito vectors of malaria in Burkina Faso
Source: Springer Nature journal article supplement (doi:10.1186/s12936-018-2288-3), 2018-04-02
Supplement: MOESM2 [file 15583034]

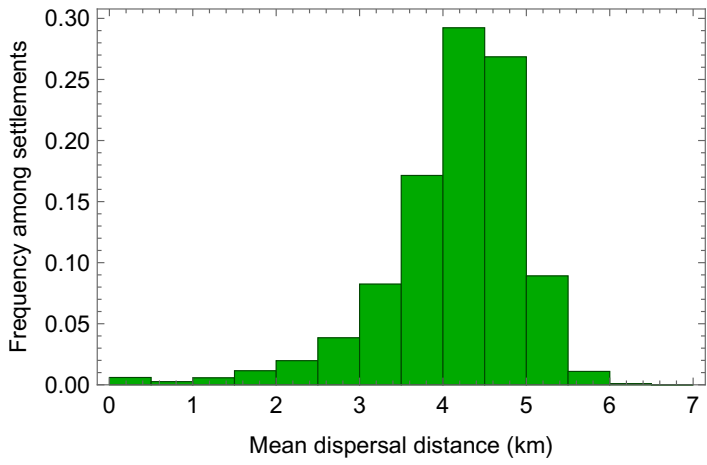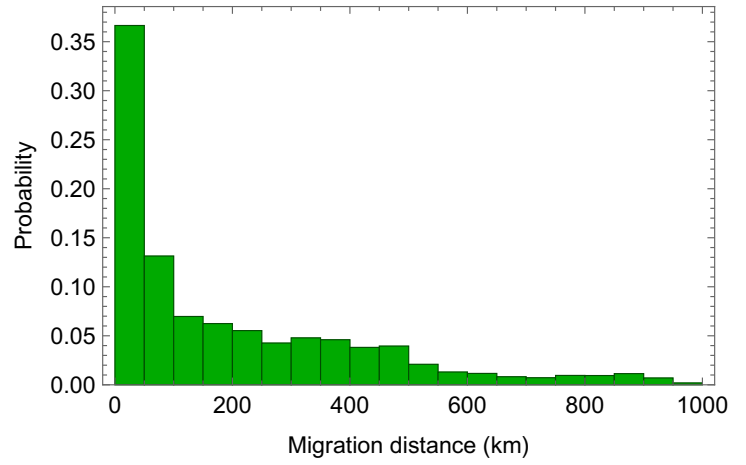

**Figure S2:** The distributions of local dispersal and migration distances across the simulation area.
