# Supplementary material for: Modelling the persistence of mosquito vectors of malaria in Burkina Faso
Source: Springer Nature journal article supplement (doi:10.1186/s12936-018-2288-3), 2018-04-02
Supplement: MOESM5 [file 15583034]

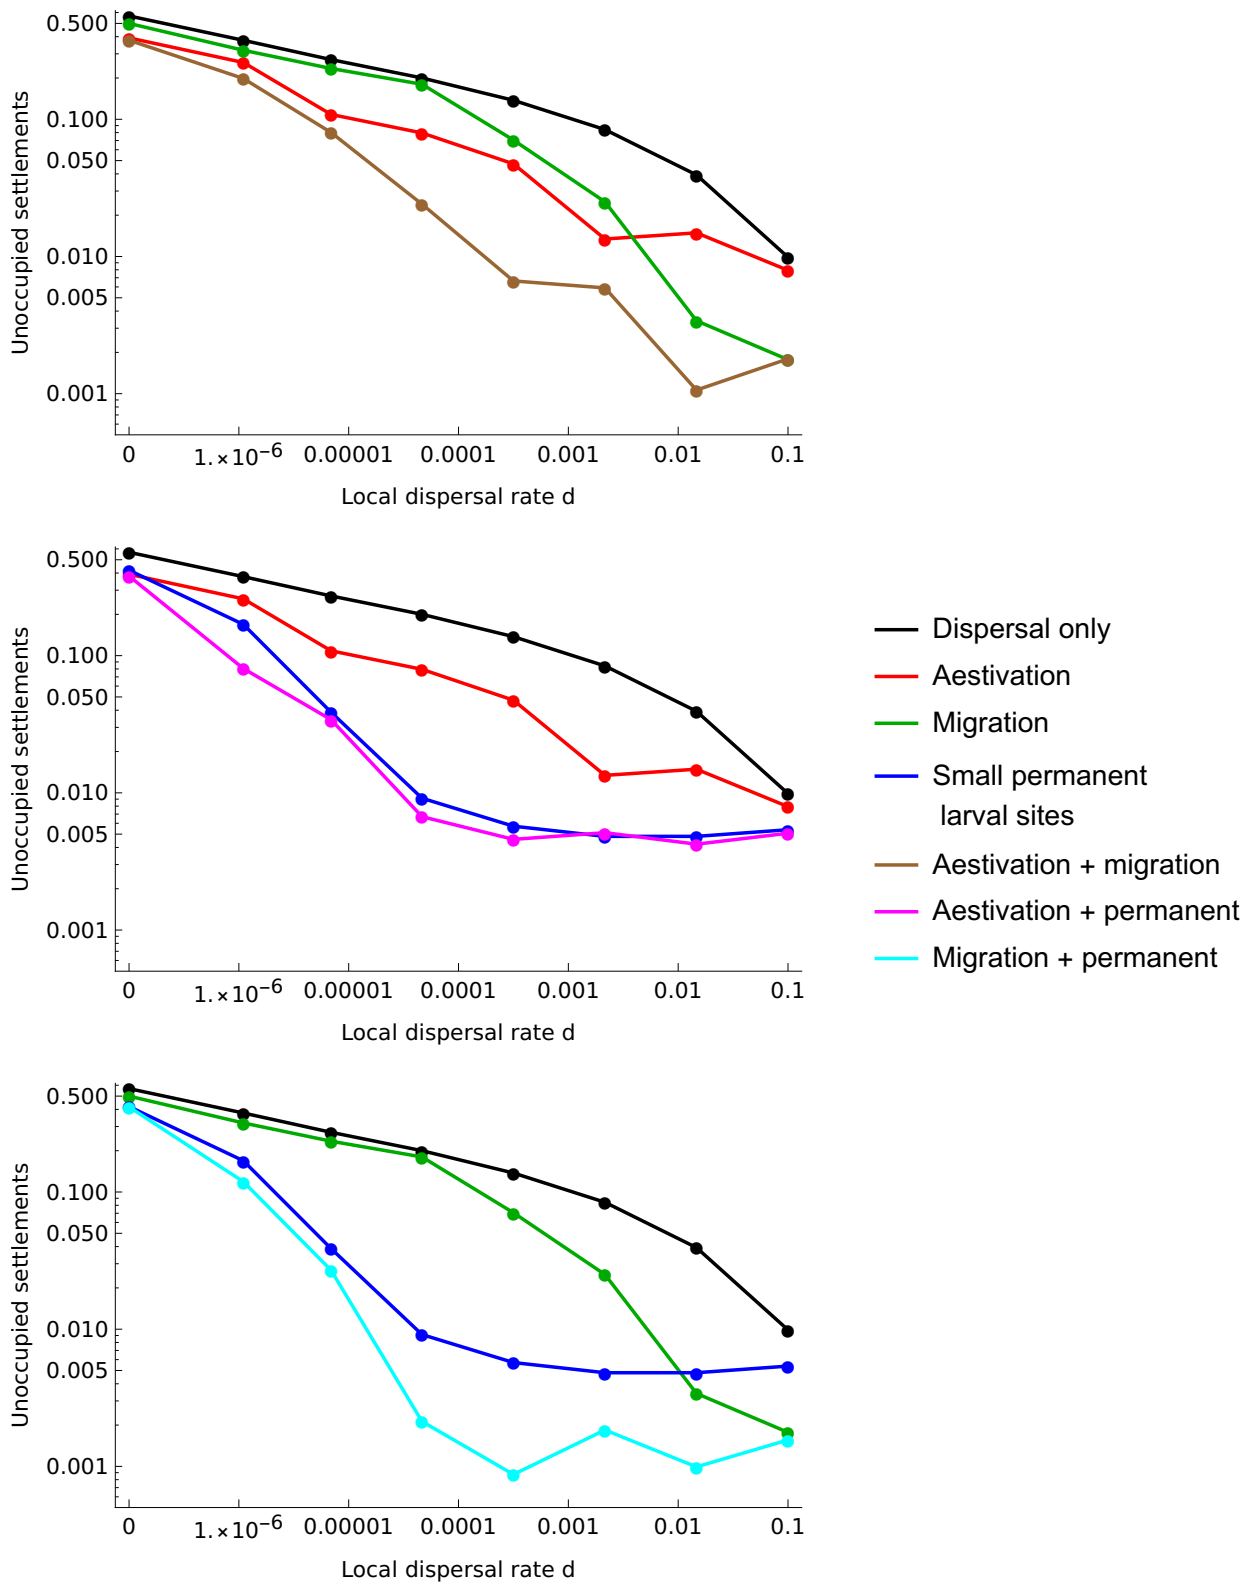

**Figure S3:** The effect of combining hypotheses to explain vector persistence, over a range of local dispersal frequencies. Aestivation parameters are  $\psi = 10^{-3}$ ,  $\mu_E = 0.9$ , migration parameters are  $d_L = 10^{-5}$ ,  $\mu_M = 0.99$ , and residual water parameters are  $\alpha_0^\mu = 4$ ,  $\alpha_0^{\sigma^2} = 10$ .
